# Supplementary material
Source: PubMed Central journal article supplement (PMC6476298)
Supplement: NIHMS1502587-supplement-Figure.pdf [file NIHMS1502587-supplement-Figure.pdf]

Supplementary Figure I. Phosphatidylethanol (PEth) by Treatment Group

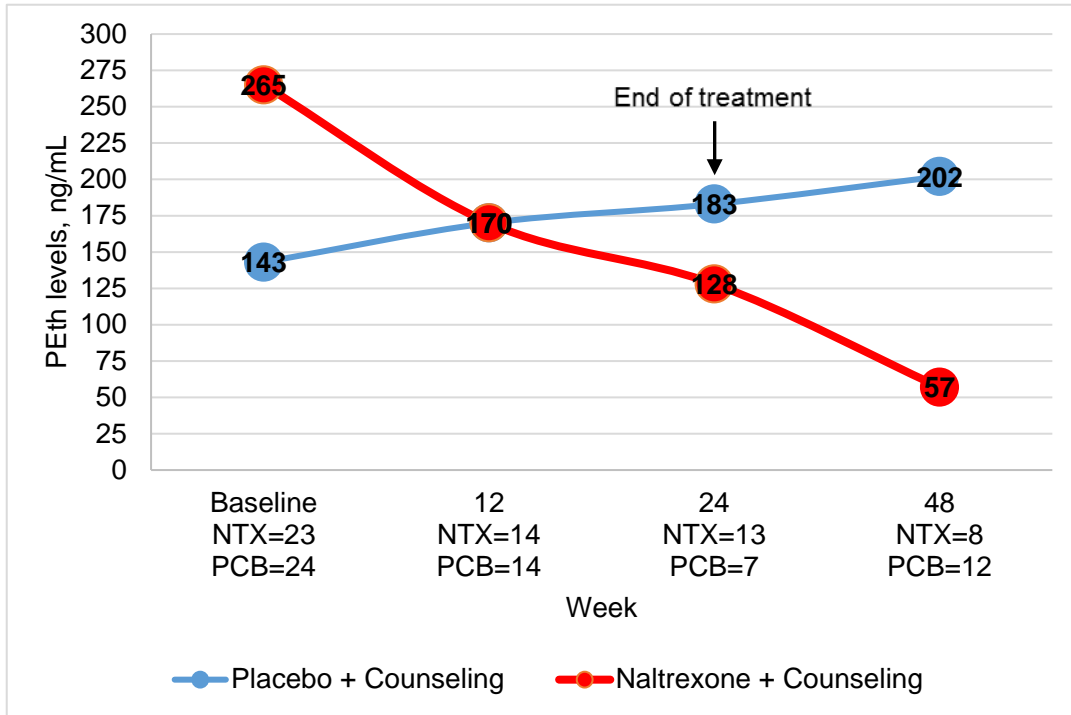

**Notes:** p value for group=0.64, group\*time=0.12; NTX=0.03, PCB=0.94; NTX=extended release naltrexone; PCB=placebo. Presented values are raw values.
